# Supplementary material for: E. coli nitroreductase NfsA is a reporter gene for non-invasive PET imaging in cancer gene therapy applications
Source: PubMed Central journal article supplement (PMC7482819; doi:10.7150/thno.46826), 2020-08-21

Supplementary file for article:

***E. coli* nitroreductase NfsA is a reporter gene for non-invasive PET imaging in cancer gene therapy applications.**

Alexandra Marie Mowday et al. Theranostics, 2020, doi:10.7150/thno.46826.

**Table S1.** Cell lines stably transfected with reductases were exposed to compounds for 18 hours at a range of concentrations followed by 5 days growth in drug-free media. Cell line IC<sub>50</sub> values (μM) were determined as the concentration required to inhibit cell growth by 50% of untreated controls. Standard errors are omitted for clarity.

| Cell line | PR-104A | EF5  | EF3  | Pimonidazole | F-Misonidazole | RSU-1069 | HX4  |
|-----------|---------|------|------|--------------|----------------|----------|------|
| WT        | 23      | 8000 | 8400 | 1200         | 6900           | 43       | 2060 |
| POR       | 31      | 4000 | 3400 | 900          | 4100           | 54       | 2840 |
| NfsA      | 0.024   | 5    | 8    | 17           | 10             | 0.4      | 40   |
| NfsB      | 0.014   | 140  | 140  | 800          | 34             | 3        | 20   |
| YcaK      | 23      | 6300 | 7400 | 1200         | 6000           | 45       | 2420 |
| YieF      | 12      | 5400 | 5500 | 900          | 7100           | 23       | 2700 |
| AzoR      | 7       | 6400 | 7600 | 1300         | 4900           | 28       | 800  |
| MdaB      | 0.7     | 7400 | 7200 | 1200         | 6100           | 22       | 5400 |
| WrbA      | 6       | 4000 | 7000 | 1900         | 8000           | 25       | 2540 |
| KefF      | 8       | 6300 | 6300 | 1300         | 7000           | 44       | 4000 |
| YcdI      | 23      | 6300 | 7400 | 1300         | 6200           | 52       | 3440 |
| YdjA      | 25      | 5000 | 4400 | 1400         | 4800           | 51       | 1840 |
| NemA      | 1.7     | 2070 | 1100 | 773          | 248            | 8.2      | 500  |

**Figure S1.** A) Plasmid map of the F279-V5 expression vector containing NfsA\_Ec and B) Western blot analysis of protein expression in HCT116 and H1299 stable cell lines. Stable HCT116 or H1299 cell lines expressing NfsA\_Ec were created using the FuGENE 6 transfection reagent and subsequent puromycin selection. Surviving cells were combined to form pooled cell populations and successful integration of the expression plasmid into cells was confirmed by western blot analysis using a polyclonal anti-NfsA\_Ec antibody.

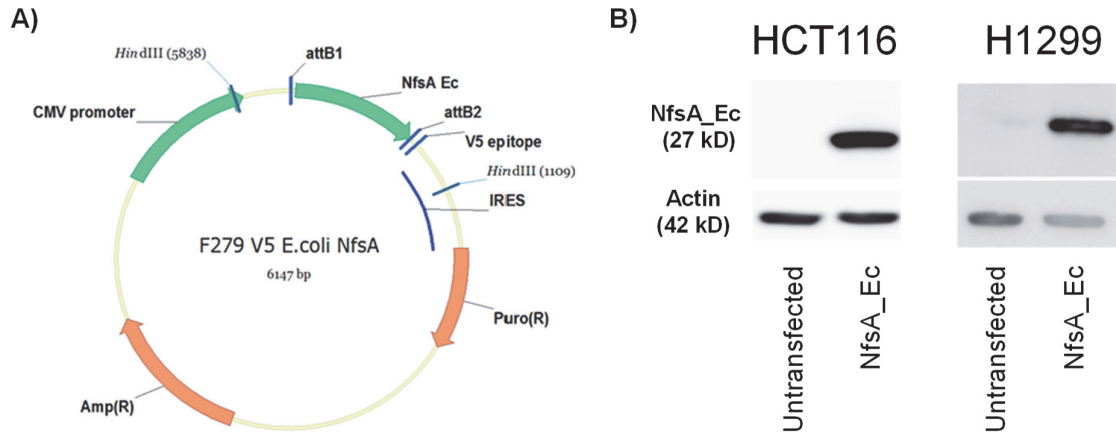

**Figure S2.** Procedure to 'phenotype' NfsA\_Ec-expressing cells following exposure to EF5 in mixed cell culture conditions. A) Summary of the 'NfsA\_Ec phenotyping procedure'. B) and C) Example of the gating mechanism used to determine the percentage and fluorescence of NfsA\_Ec-expressing cells. Cells were treated with EF5 in 3D conditions (MCL or tumour xenograft). Following trypsinisation,  $1 \times 10^6$  cells were plated as a single layer and exposed to 20  $\mu\text{M}$  pimonidazole for one hour at 37 °C in air. EF5 adducts were detected using a specific antibody conjugated to CY5 and pimonidazole adducts were detected using a specific antibody conjugated to FITC.

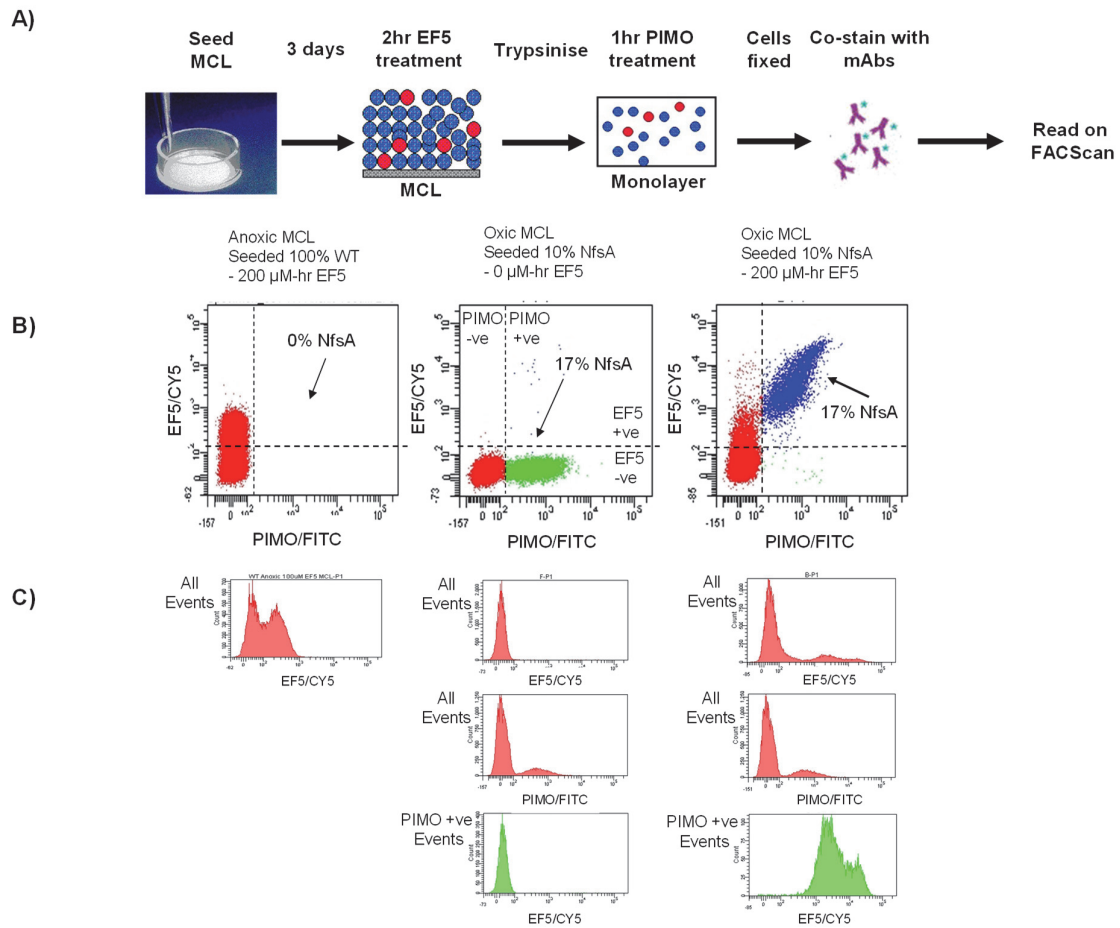

Supplement: thnov10p10548s1.pdf [file thnov10p10548s1.pdf]
